# Supplementary material
Source: PubMed Central journal article supplement (PMC5838614)
Supplement: jamainternmed-178-229-s001.pdf [file jamainternmed-178-229-s001.pdf]

## Supplementary Online Content

Wang M-T, Liou J-T, Lin CW, et al. Association of cardiovascular risk with inhaled long-acting bronchodilators in patients with chronic obstructive pulmonary disease: a nested case-control study. *JAMA Intern Med*. Published online January 2, 2018. doi: 10.1001/jamainternmed.2017.7720

**eMethods 1.** Development of a disease risk score-matched nested case-control study

**eMethods 2.** Modeling a nonlinear duration-response association using a restricted cubic splines function model.

**eMethods 3.** A case-crossover study for assessing the association between the CVD risk and use of LABAs and LAMAs

**eTable 1.** Diagnosis codes used to define the comorbidities and individual drugs of comedication

**eTable 2.** Comparison of CVD risk between new LAMA use and new LABA use

**eTable 3.** Risk of each primary cardiovascular outcome with new LABA and LAMA use

**eTable 4.** Case-crossover analysis for the risk of CVDs with use of LABA and LAMA within 30 days

**eTable 5.** Clinical characteristics of CVD patients during the case and control periods in an alternative case-crossover study

**eTable 6.** Numbers needed to harm for patients who had an increased CVD risk from using LABAs and LAMAs in our primary and secondary analyses

**eFigure 1.** Overview for the adopted nested case-control study design. CVD, cardiovascular disease; COPD, chronic obstructive pulmonary disease; ER, emergency room; NHI represents National Health Insurance

**eFigure 2.** Specification of case and control periods in an alternative case-crossover study

**eFigure 3.** The impact of unmeasured confounders assessed by the rule-out method

**eFigure 4.** Study flow diagram outlining the selection of study cohort

This supplementary material has been provided by the authors to give readers additional information about their work.

## **eMethods 1. Development of a disease risk score-matched nested case-control study**

A disease risk score (DRS) of encountering the cardiovascular outcome of interest for each patient of the study cohort was estimated. Specifically, we predicted the probability of developing the cardiovascular outcome during the follow-up of the entire study cohort by fitting a multiple conditional logistic regression with all factors considered in the Table 1, which were measured in the year preceding cohort entry, as well as the exposure status to inhaled long-acting bronchodilators, including inhaled long-acting  $\beta_2$  agonists (LABAs) and long-acting antimuscarinic antagonists (LAMAs) that were measured during the entire follow-up period. The DRS of the cardiovascular outcomes was then computed as the fitted values from the abovementioned logistic regression model for each cohort member when setting the exposure status to inhaled long-acting bronchodilators as no use.

After obtaining the DRS for each cohort member, we matched each case of cardiovascular disease patient with up to 4 controls by cohort entry date ( $\pm$  180 days) and the DRS ( $\pm$  0.01) with a greedy matching approach. We detailed the DRS matching scheme as follows. For each case, we selected up to 4 controls that had the closest DRS values as the corresponding case's value, and required the controls' DRS

values to be within 0.01 of the case' value. If there were more than 4 eligible controls per case during the matching process, 4 controls were randomly selected.

## **eMethods 2. Modeling a nonlinear duration-response association using a restricted cubic splines function model.**

In order to assess the duration of new LABA and LAMA therapies, we restricted LABA or LAMA users to those with at least one prescription record of inhaled long-acting bronchodilators within the 30 days preceding the index/event date, among whom any users of LABAs or LAMAs in the year preceding the index date were excluded. We then calculated continuous use of LABAs and LAMAs using a grace period of 30 days between successive prescriptions.

We further analyzed duration of new LABA and LAMA therapy as a continuous exposure variable, respectively, using restricted cubic splines function models. Specifically, we fitted the duration-response curves using a restricted cubic splines function with five knots, located at 15, 30, 45, 90, and 180 days in a multiple conditional logistic regression model, which adjusted the covariates with standardized difference  $> 0.1$  listed in Table 1.

### **eMethods 3. A case-crossover study for assessing the association between the CVD risk and use of LABAs and LAMAs**

A case-crossover study is a mean to control measured and unmeasured confounders that stay stable over time, in which exposures are compared at individual case levels between two or more time periods preceding the outcomes. From the final 37,719 CVD cases identified in our nested case-control study of COPD patients, we excluded people who did not have at least 120 days of follow-up before their index date, and the remaining CVD patients were included in the case-crossover study (n=27,036). For each of the 27,036 CVD patients, we defined day 1-30 before the index date as the case period and day 91-120 as the control period (as shown in eFigure 2). The CVD patients were considered exposed if the date that they filled LABA or LAMA prescriptions occurred within the case or the control time period. The odds ratio (OR) of CVD events that required a hospital or an ER visit from exposure to LABA or LAMA was determined using conditional logistic regression models that adjusted for imbalanced covariates between the two time periods (as indicated in eTable 5).

**eTable 1. Diagnosis codes used to define the comorbidities and individual drugs of comedications**

| <b>Comorbidities</b>                                          | <b>ICD-9-CM codes</b>                                                                                                                                                                                                                                                                                                                                                                                                                                                                                                                                                                                                                                                                                                                                                                                                     |
|---------------------------------------------------------------|---------------------------------------------------------------------------------------------------------------------------------------------------------------------------------------------------------------------------------------------------------------------------------------------------------------------------------------------------------------------------------------------------------------------------------------------------------------------------------------------------------------------------------------------------------------------------------------------------------------------------------------------------------------------------------------------------------------------------------------------------------------------------------------------------------------------------|
| Hypertension                                                  | 401-405                                                                                                                                                                                                                                                                                                                                                                                                                                                                                                                                                                                                                                                                                                                                                                                                                   |
| Diabetes Mellitus                                             | 250                                                                                                                                                                                                                                                                                                                                                                                                                                                                                                                                                                                                                                                                                                                                                                                                                       |
| Asthma                                                        | 493                                                                                                                                                                                                                                                                                                                                                                                                                                                                                                                                                                                                                                                                                                                                                                                                                       |
| Pulmonary disease                                             |                                                                                                                                                                                                                                                                                                                                                                                                                                                                                                                                                                                                                                                                                                                                                                                                                           |
| Acute bronchitis                                              | 466.0                                                                                                                                                                                                                                                                                                                                                                                                                                                                                                                                                                                                                                                                                                                                                                                                                     |
| Pneumonia                                                     | 480-486                                                                                                                                                                                                                                                                                                                                                                                                                                                                                                                                                                                                                                                                                                                                                                                                                   |
| Influenza                                                     | 487.1, 487.8                                                                                                                                                                                                                                                                                                                                                                                                                                                                                                                                                                                                                                                                                                                                                                                                              |
| Pulmonary embolism                                            | 415.1                                                                                                                                                                                                                                                                                                                                                                                                                                                                                                                                                                                                                                                                                                                                                                                                                     |
| Cardiovascular disease                                        |                                                                                                                                                                                                                                                                                                                                                                                                                                                                                                                                                                                                                                                                                                                                                                                                                           |
| Peripheral vascular disease                                   | 440-448                                                                                                                                                                                                                                                                                                                                                                                                                                                                                                                                                                                                                                                                                                                                                                                                                   |
| Rheumatic heart disease                                       | 391, 393-398                                                                                                                                                                                                                                                                                                                                                                                                                                                                                                                                                                                                                                                                                                                                                                                                              |
| Hemorrhagic stroke                                            | 430-432                                                                                                                                                                                                                                                                                                                                                                                                                                                                                                                                                                                                                                                                                                                                                                                                                   |
| Hyperlipidemia                                                | 272                                                                                                                                                                                                                                                                                                                                                                                                                                                                                                                                                                                                                                                                                                                                                                                                                       |
| Cancer                                                        | 140-239                                                                                                                                                                                                                                                                                                                                                                                                                                                                                                                                                                                                                                                                                                                                                                                                                   |
| Renal failure                                                 | 584-588                                                                                                                                                                                                                                                                                                                                                                                                                                                                                                                                                                                                                                                                                                                                                                                                                   |
| Dementia                                                      | 290                                                                                                                                                                                                                                                                                                                                                                                                                                                                                                                                                                                                                                                                                                                                                                                                                       |
| Chronic liver disease                                         | 571                                                                                                                                                                                                                                                                                                                                                                                                                                                                                                                                                                                                                                                                                                                                                                                                                       |
| Parkinsonism                                                  | 332                                                                                                                                                                                                                                                                                                                                                                                                                                                                                                                                                                                                                                                                                                                                                                                                                       |
| <b>Comedications</b>                                          | <b>Individual drugs</b>                                                                                                                                                                                                                                                                                                                                                                                                                                                                                                                                                                                                                                                                                                                                                                                                   |
| Antibiotics (for defining moderate COPD exacerbation)         | Amikacin, amoxicillin, ampicillin, azithromycin, bacampicillin, benzylpenicillin, cefaclor, cefadroxil, cefamandole, cefatrizine, cefazedone, cefazolin, cefepime, cefmenoxime, cefmetazole, cefonicid, cefoperazone, cefotaxime, cefotetan, cefotiam, ceftioxin, ceftioxiime, cefpodoxime, cefradine, ceftazidime, ceftibuten, ceftizoxime, ceftriaxone, cefuroxime, ciprofloxacin, clarithromycin, clindamycin, doxycycline, doxycycline, ertapenem, erythromycin, flucloxacillin, gemifloxacin, gentamicin, imipenem, isepamicin, latamoxef, levofloxacin, linezolid, meropenem, metampicillin, minocycline, moxifloxacin, ofloxacin, oxacillin, penicillin, piperacillin, sparfloxacin, teicoplanin, telithromycin, tetracycline, ticarcillin, tigecycline, Trimethoprim/sulfamethoxazole, tobramycin, and vancomycin |
| Oral corticosteroid (for defining moderate COPD exacerbation) | Betamethasone, cortisone, dexamethasone, fludrocortisone, methylprednisolone, paramethasone, prednisolone, and                                                                                                                                                                                                                                                                                                                                                                                                                                                                                                                                                                                                                                                                                                            |

|  |               |
|--|---------------|
|  | triamcinolone |
|--|---------------|



**Table 1. Diagnosis codes used to define the comorbidities and individual drugs of comedICATIONS (continued)**

| Comedications                           | Individual drugs                                                                                                                                                                                                                                                  |
|-----------------------------------------|-------------------------------------------------------------------------------------------------------------------------------------------------------------------------------------------------------------------------------------------------------------------|
| Cardiovascular medication               |                                                                                                                                                                                                                                                                   |
| Antiplatelets                           | Abciximab, alteplase, aspirin ( $\leq 325$ mg), cilostazol, clopidogrel, dipyridamole, epoprostenol, eptifibatide, iloprost, ticagrelor, ticlopidine, tirofiban, and treprostinil                                                                                 |
| Calcium channel blockers                | Amlodipine, barnidipine, benidipine, diltiazem, felodipine, isradipine, lacidipine, lercanidipine, ncardipine, nifedipine, nimodipine, nisoldipine, nitrendipine, and verapamil                                                                                   |
| Diuretics                               | Amiloride, bendroflumethiazide, benzyhydrochlorothiazide, bumetanide, canrenoate, clopamide, eplerenone, ethacrynic acid, furosemide, hydralazine, hydrochlorothiazide, indapamide, metolazone, spironolactone, thiabutazide, triamterene, and trichlormethiazide |
| Angiotensin receptor blockers           | Candesartan, eprosartan, irbesartan, losartan, olmesartan, telmisartan, and valsartan                                                                                                                                                                             |
| Angiotensin-converting enzyme Inhibitor | Benazepril, captopril, cilazapril, enalapril, fosinopril, imidapril, indapamide, lisinopril, perindopril, quinapril, and ramipril                                                                                                                                 |
| $\beta$ -blockers                       |                                                                                                                                                                                                                                                                   |
| CV-selective                            | Acebutolol, atenolol, betaxolol, bisoprolol, and metoprolol                                                                                                                                                                                                       |
| Non-CV-selective                        | Alprenolol, carteolol, carvedilol, labetalol, levobunolol, metipranolol, nadolol, oxprenolol, pindolol, propranolol, sotalol, and timolol                                                                                                                         |
| Digoxin                                 | Digoxin                                                                                                                                                                                                                                                           |
| Antiarrhythmic agents                   | Adenosine, amiodarone, disopyramide, dronedarone, flecainide, lidocaine, mexiletine, prajmaline, procainamide, propafenone and quinidine                                                                                                                          |
| Nitrates                                | Glyceryl trinitrate, isosorbide dinitrate, pentaerythritol tetranitrate, and thiamine mononitrate                                                                                                                                                                 |
| Anticoagulants                          | Dalteparin, dabigatran, enoxaparin, fondaparinux, unfractionated heparin, nadroparine, phenindione, rivaroxaban, streptokinase, tenecteplase, tinzaparin, urokinase, and warfarin                                                                                 |
| Lipid-lowering agents                   |                                                                                                                                                                                                                                                                   |
| Statins                                 | Atorvastatin, fluvastatin, lovastatin, pitavastatin, pravastatin, rosuvastatin, and simvastatin                                                                                                                                                                   |
| Others                                  | Acipimox, bezafibrate, cholestyramine, clofibrate,                                                                                                                                                                                                                |

|                                 |                                                                                                                                         |
|---------------------------------|-----------------------------------------------------------------------------------------------------------------------------------------|
|                                 | colestipol, etofibrate, ezetimibe, fenofibrate, gemfibrozil, inositol, niacin, niceritrol, nicomol, probucol, simfibrate, and xanthinol |
| COPD medications                |                                                                                                                                         |
| Methylxanthines                 | Aminophylline, diprophylline and theophylline                                                                                           |
| Short-acting $\beta_2$ agonists | Fenoterol, levalbuterol, procaterol, salbutamol, and terbutaline                                                                        |

**Table 1. Diagnosis codes used to define the comorbidities and individual drugs of comedICATIONS (continued)**

| Comedications                       | Individual drugs                                                                                                                                                                                                                                                                                                                                                                                                                                                                                                  |
|-------------------------------------|-------------------------------------------------------------------------------------------------------------------------------------------------------------------------------------------------------------------------------------------------------------------------------------------------------------------------------------------------------------------------------------------------------------------------------------------------------------------------------------------------------------------|
| Short-acting muscarinic antagonists | Ipratropium                                                                                                                                                                                                                                                                                                                                                                                                                                                                                                       |
| Inhaled corticosteroids             | Beclomethasone, budesonide, and fluticasone                                                                                                                                                                                                                                                                                                                                                                                                                                                                       |
| Oral long-acting $\beta_2$ agonists | Formoterol                                                                                                                                                                                                                                                                                                                                                                                                                                                                                                        |
| Systemic anticholinergics           |                                                                                                                                                                                                                                                                                                                                                                                                                                                                                                                   |
| Antihistamine                       | Brompheniramine, buclizine, chlorpheniramine, clemastine, cyclizine, cyproheptadine, dexchlorpheniramine, dimenhydrinate, diphenhydramine, hydroxyzine, meclizine, promethazine, and triprolidine                                                                                                                                                                                                                                                                                                                 |
| Gastrointestinal antispasmodics     | Alverine, anisotropine, atropine, dicyclomine, dicycloverine, glycopyrronium, glycopyrrolate, homatropine, mebeverine, mepenzolate, methscopolamine, otilonium, oxapium, oxyphencyclimine, piperidolate, prifinium, propantheline, scopolamine, timepidium, trimebutine and valethamate                                                                                                                                                                                                                           |
| Bladder antimuscarinics             | Flavoxate, oxybutynin, solifenacin, tolterodine, and trospium                                                                                                                                                                                                                                                                                                                                                                                                                                                     |
| Others                              | Benztropine, biperiden, prioheptine and trihexyphenidyl                                                                                                                                                                                                                                                                                                                                                                                                                                                           |
| NSAIDs                              | Aceclofenac, acemetacin, alclofenac, alminoprofen, aspirin(>325mg), benzydamine, celecoxib, diclofenac, etodolac, etofenamate, etoricoxib, fenbufen, fenoprofen, flufenamic acid, flurbiprofen, ibuprofen, indomethacin, ketoprofen, ketorolac tromethamine, meclofenamic acid, mefenamic acid, meloxicam, mepirizole, nabumetone, naproxen, nefopam, niflumic acid, nimesulide, phenylbutazone, piroxicam, rofecoxib, salsalate, sulindac, tenoxicam, tiaprofenic acid, tiaramide, tolfenamic acid, and tolmetin |
| Systematic corticosteroids          | Betamethasone, cortisone, dexamethasone, fludrocortisone, fluocortolone, hydrocortisone, methandrostenolone, methylpredisolone, nandrolone, oxymetholone, paramethasone, phenylbutazone, prednisolone, stanozolol, and triamcinolone                                                                                                                                                                                                                                                                              |
| Antipsychotic                       | Amisulpride, aripiprazole, chlorpromazine, chlorprothixene, clopenthixol, clothiapine, droperidol, flupentixol, fluphenazine, haloperidol, levomepromazine, loxapine, methotrimeprazine, olanzapine,                                                                                                                                                                                                                                                                                                              |

|                |                                                                                                                                                                                                                                                           |
|----------------|-----------------------------------------------------------------------------------------------------------------------------------------------------------------------------------------------------------------------------------------------------------|
|                | paliperidone, perphenazine, prochlorperazine, quetiapine, risperidone, sulpiride, thioridazine, trifluoperazine, ziprasidone, and zotepine                                                                                                                |
| Antidepressant | Amitriptyline, bupropion, citalopram, clomipramine, dothiepin, doxepin, duloxetine, escitalopram, fluoxetine, fluvoxamine, imipramine, maprotiline, melitracen, milnacipran, mirtazapine, moclobemide, paroxetine, sertraline, trazodone, and venlafaxine |

Abbreviations: COPD = Chronic obstructive pulmonary disease; CV = Cardiovascular; NSAIDs = nonsteroidal anti-inflammatory drugs.

**eTable 2. Comparison of CVD risk between new LAMA use and new LABA use**

| <b>Bronchodilator</b> | <b>Crude OR<br/>(95% CI)</b> | <b><i>P</i> value</b> | <b>Adjusted OR<sup>a</sup><br/>(95% CI)</b> | <b><i>P</i> value</b> |
|-----------------------|------------------------------|-----------------------|---------------------------------------------|-----------------------|
| New LABA use, n (%)   | Reference                    |                       | Reference                                   |                       |
| New LAMA use, n (%)   | 0.93 (0.76-1.14)             | 0.491                 | 1.01 (0.82-1.23)                            | 0.93                  |

Abbreviations: LABA = inhaled long-acting  $\beta_2$  agonist; LAMA = long-acting antimuscarinic antagonists; CI = confidence interval; OR = odds ratio.

<sup>a</sup> Adjusted for all covariate with SD > 0.1 in Table 1.

**eTable 3. Risk of each primary cardiovascular outcome with new LABA and LAMA use**

| <b>Cardiovascular event</b>    | <b>Crude OR<br/>(95% CI)</b> | <b>P value</b> | <b>Adjusted OR<sup>a</sup><br/>(95% CI)</b> | <b>P value</b> |
|--------------------------------|------------------------------|----------------|---------------------------------------------|----------------|
| CVD subtype                    |                              |                |                                             |                |
| <b>Coronary artery disease</b> |                              |                |                                             |                |
| LABA new use vs nonuse         | 2.15 (1.83-2.52)             | <0.001         | 2.01 (1.71-2.38)                            | <0.001         |
| LAMA new use vs nonuse         | 1.92 (1.48-2.48)             | <0.001         | 1.89 (1.45-2.46)                            | <0.001         |
| Both new use vs nonuse         | 3.60 (2.22-5.84)             | <0.001         | 3.25 (1.97-5.36)                            | <0.001         |
| New LAMA vs New LABA           | 0.89 (0.66-1.21)             | 0.47           | 0.95 (0.70-1.29)                            | 0.74           |
| <b>Heart failure</b>           |                              |                |                                             |                |
| LABA new use vs nonuse         | 1.82 (1.50-2.21)             | <0.001         | 1.42 (1.16-1.75)                            | 0.001          |
| LAMA new use vs nonuse         | 1.55 (1.14-2.10)             | 0.005          | 1.56 (1.14-2.14)                            | 0.006          |
| Both new use vs nonuse         | 2.18 (1.04-4.57)             | 0.038          | 1.72 (0.79-3.75)                            | 0.17           |
| New LAMA vs New LABA           | 0.85 (0.59-1.22)             | 0.38           | 1.09 (0.75-1.59)                            | 0.64           |
| <b>Ischemic stroke</b>         |                              |                |                                             |                |
| LABA new use vs nonuse         | 1.10 (0.85-1.42)             | 0.48           | 1.06 (0.81-1.37)                            | 0.69           |
| LAMA new use vs nonuse         | 1.00 (0.62-1.62)             | 0.99           | 0.93 (0.58-1.51)                            | 0.78           |
| Both new use vs nonuse         | 0.45 (0.10-1.96)             | 0.29           | 0.38 (0.09-1.67)                            | 0.20           |
| New LAMA vs New LABA           | 0.91 (0.53-1.58)             | 0.75           | 0.87 (0.50-1.50)                            | 0.61           |
| <b>Cardiac arrhythmia</b>      |                              |                |                                             |                |
| LABA new use vs nonuse         | 1.58 (1.18-2.11)             | 0.002          | 1.27 (0.94-1.72)                            | 0.12           |
| LAMA new use vs nonuse         | 1.89 (1.16-3.08)             | 0.011          | 1.67 (1.02-2.76)                            | 0.042          |

**eTable 3. Risk of each primary cardiovascular outcome among new LABA and LAMA use (continued)**

| <b>Cardiovascular event</b> | <b>Crude OR<br/>(95% CI)</b> | <b><i>P</i> value</b> | <b>Adjusted OR<sup>a</sup><br/>(95% CI)</b> | <b><i>P</i> value</b> |
|-----------------------------|------------------------------|-----------------------|---------------------------------------------|-----------------------|
| Both new use vs<br>nonuse   | 2.03 (0.76-5.41)             | 0.16                  | 1.87 (0.68-5.13)                            | 0.23                  |
| New LAMA vs<br>New LABA     | 1.19 (0.68-2.11)             | 0.54                  | 1.31 (0.73-2.33)                            | 0.36                  |

Abbreviations: LABA = inhaled long-acting  $\beta_2$  agonist; LAMA = long-acting antimuscarinic antagonists; OR, odds ratio; CI, confidence interval.

<sup>a</sup> Adjusted for all covariates with SD > 0.1 in Table 1.

**eTable 4. Case-crossover analysis for the risk of CVDs with use of LABA and LAMA within 30 days**

| <b>Bronchodilator</b>           | <b>Case period<br/>(n=27,036)</b> | <b>Control period<br/>(n=27,036)</b> | <b>Crude OR<br/>(95% CI)</b> | <b>P value</b> | <b>Adjusted OR<sup>a</sup><br/>(95% CI)</b> | <b>P value</b> |
|---------------------------------|-----------------------------------|--------------------------------------|------------------------------|----------------|---------------------------------------------|----------------|
| Nonuse of LABAs or LAMAs, n (%) | 24,669 (91.3)                     | 25,020 (92.5)                        | Reference                    |                | Reference                                   |                |
| LABA use                        | 1,472 (5.4)                       | 1,243 (4.6)                          | 1.49 (1.33-1.67)             | <0.001         | 1.36 (1.21-1.53)                            | <0.001         |
| LAMA use                        | 656 (2.4)                         | 586 (2.2)                            | 1.39 (1.17-1.65)             | <0.001         | 1.26 (1.05-1.51)                            | 0.032          |
| LABA & LAMA use                 | 239 (0.9)                         | 187 (0.7)                            | 1.84 (1.40-2.41)             | <0.001         | 1.63 (1.23-2.16)                            | <0.001         |

Abbreviations: LABA = inhaled long-acting  $\beta_2$  agonist; LAMA = long-acting antimuscarinic antagonists; CVD = cardiovascular disease; CI = confidence interval; OR = odds ratio.

<sup>a</sup> Adjusted for covariates with SD > 0.1 in eTable 5.



**eTable 5. Clinical characteristics of CVD patients during the case and control periods in an alternative case-crossover study**

| Characteristics                                   | Case period<br>(n=27,036) | Control period<br>(n=27,036) | SD <sup>a</sup> |
|---------------------------------------------------|---------------------------|------------------------------|-----------------|
| Age, mean (SD), y                                 | 75.33 ±10.22              | 75.33 ±10.22                 | 0.001           |
| Sex, male No. (%)                                 | 19,294 (71.4)             | 19,294 (71.4)                | <0.001          |
| <b>COPD severity indicators, No. (%)</b>          |                           |                              |                 |
| Number of severe COPD exacerbation <sup>b</sup>   |                           |                              |                 |
| 0                                                 | 19,045 (70.4)             | 18,736 (69.3)                | 0.014           |
| 1                                                 | 5,942 (22.0)              | 6,320 (23.4)                 |                 |
| ≥ 2                                               | 2,049 (7.6)               | 1,980 (7.3)                  |                 |
| Number of moderate COPD exacerbation <sup>c</sup> |                           |                              |                 |
| 0                                                 | 26,400 (97.7)             | 26,494 (98.0)                | 0.023           |
| 1                                                 | 587 (2.2)                 | 499 (1.9)                    |                 |
| ≥ 2                                               | 49 (0.2)                  | 43 (0.2)                     |                 |
| Number of type of COPD medications                |                           |                              |                 |
| 0                                                 | 23,954 (88.6)             | 24,551 (90.8)                | 0.070           |
| 1~2                                               | 2,012 (7.4)               | 1,638 (6.1)                  |                 |
| ≥ 3                                               | 1,070 (4.0)               | 847 (3.1)                    |                 |
| <b>Healthcare use, No. (%)</b>                    |                           |                              |                 |
| No. of outpatient visits                          |                           |                              |                 |
| ≤ 5                                               | 23,184 (85.8)             | 24,312 (89.9)                | 0.129           |
| 6-10                                              | 3,155 (11.7)              | 2,303 (8.5)                  |                 |
| ≥ 11                                              | 697 (2.6)                 | 421 (1.6)                    |                 |
| <b>Comorbidities, No. (%)</b>                     |                           |                              |                 |
| Pulmonary disease                                 |                           |                              |                 |
| Asthma                                            | 3,710 (13.7)              | 3,085 (11.4)                 | 0.070           |
| Acute bronchitis                                  | 3,486 (12.9)              | 2,814 (10.4)                 | 0.078           |
| Pneumonia                                         | 3,120 (11.5)              | 2,308 (8.5)                  | 0.010           |
| Influenza                                         | 383 (1.4)                 | 282 (1.0)                    | 0.034           |
| Pulmonary embolism                                | 75 (0.3)                  | 50 (0.2)                     | 0.019           |
| CV disease                                        |                           |                              |                 |
| Hypertention                                      | 15,511 (57.4)             | 14,480 (53.6)                | 0.077           |
| Peripheral vascular disease                       | 1,066 (3.9)               | 906 (3.4)                    | 0.032           |
| Rheumatic heart disease                           | 498 (1.8)                 | 409 (1.5)                    | 0.026           |
| Hemorrhagic stroke                                | 351 (1.3)                 | 307 (1.1)                    | 0.015           |
| Diabetes Mellitus                                 | 7,009 (25.9)              | 6,533 (24.2)                 | 0.041           |

|                |              |              |       |
|----------------|--------------|--------------|-------|
| Hyperlipidemia | 3,830 (14.2) | 3,438 (12.7) | 0.043 |
|----------------|--------------|--------------|-------|

**Table 5. Clinical characteristics of CVD patients during the case and control periods in an alternative case-crossover study (continued)**

| Characteristics                         | Case period<br>(n=27,036) | Control period<br>(n=27,036) | SD <sup>a</sup> |
|-----------------------------------------|---------------------------|------------------------------|-----------------|
| Cancer                                  | 2,421 (9.0)               | 2,109 (7.8)                  | 0.042           |
| Renal failure                           | 2,155 (8.0)               | 1,838 (6.8)                  | 0.045           |
| Dementia                                | 2,103 (7.8)               | 1,867 (6.9)                  | 0.033           |
| Chronic liver disease                   | 1,190 (4.4)               | 1,057 (3.9)                  | 0.025           |
| Parkinsonism                            | 1,009 (3.7)               | 905 (3.4)                    | 0.021           |
| <b>Comedication, No. (%)</b>            |                           |                              |                 |
| CV medication                           |                           |                              |                 |
| Antiplatelets                           | 14,634 (54.1)             | 12,317 (45.6)                | 0.115           |
| Calcium channel blockers                | 13,990 (51.8)             | 12,817 (47.4)                | 0.087           |
| Diuretics                               | 12,388 (45.8)             | 10,735 (39.7)                | 0.124           |
| Angiotensin receptor blockers           | 9,254 (34.2)              | 8,424 (31.2)                 | 0.065           |
| Angiotensin-converting enzyme inhibitor | 4,446 (16.4)              | 3,878 (14.3)                 | 0.058           |
| β-blockers                              |                           |                              |                 |
| CV-selective                            | 4,048 (15.0)              | 3,399 (12.6)                 | 0.070           |
| Non-CV-selective                        | 4,380 (16.0)              | 3,527 (13.1)                 | 0.089           |
| Digoxin                                 | 2,971 (11.0)              | 2,382 (8.8)                  | 0.073           |
| Antiarrhythmic agents                   | 2,386 (8.8)               | 1,841 (6.8)                  | 0.075           |
| Nitrates                                | 1,964 (7.3)               | 1,425 (5.3)                  | 0.082           |
| Anticoagulants                          | 1,486 (5.5)               | 1,114 (4.1)                  | 0.064           |
| Lipid-lowering agents                   |                           |                              |                 |
| Statins                                 | 4,145 (15.3)              | 3,688 (13.6)                 | 0.048           |
| Others                                  | 60 (0.2)                  | 49 (0.2)                     | 0.009           |
| COPD medications                        |                           |                              |                 |
| Methylxanthines                         | 1,203 (4.5)               | 955 (3.7)                    | 0.039           |
| Short-acting β <sub>2</sub> agonists    |                           |                              |                 |
| Oral / injection                        | 6,971 (25.8)              | 6,385 (23.6)                 | 0.050           |
| Nebulized                               | 709 (2.6)                 | 544 (2.0)                    | 0.041           |
| Inhaled                                 |                           |                              |                 |
| 0 canister                              | 24,872 (92.0)             | 25,285 (93.5)                | 0.058           |
| ≤ 6 canisters                           | 2,045 (7.6)               | 1,655 (6.1)                  |                 |
| > 6 canisters                           | 119 (0.4)                 | 96 (0.4)                     |                 |

|                                     |             |             |       |
|-------------------------------------|-------------|-------------|-------|
| Short-acting muscarinic antagonists |             |             |       |
| Nebulized                           | 1,599 (5.9) | 1,263 (4.7) | 0.056 |

**Table 5. Clinical characteristics of CVD patients during the case and control periods in an alternative case-crossover study (continued)**

| Characteristics                     | Case period<br>(n=27,036) | Control period<br>(n=27,036) | SD <sup>a</sup> |
|-------------------------------------|---------------------------|------------------------------|-----------------|
| Inhaled                             |                           |                              |                 |
| 0 canister                          | 25,802 (95.4)             | 26,093 (96.5)                | 0.054           |
| ≤ 6 canisters                       | 1,190 (4.4)               | 911 (3.4)                    |                 |
| > 6 canisters                       | 44 (0.2)                  | 32 (0.1)                     |                 |
| Inhaled corticosteroids             | 396 (1.5)                 | 306 (1.1)                    | 0.029           |
| Oral long-acting $\beta_2$ agonists | 241 (0.9)                 | 203 (0.8)                    | 0.016           |
| Systemic Anticholinergic            |                           |                              |                 |
| Antihistamine                       | 7,876 (29.1)              | 6,753 (25.0)                 | 0.094           |
| Gastrointestinal antispasmodics     | 1,831 (6.8)               | 1,607 (5.9)                  | 0.034           |
| Bladder antimuscarinics             | 1,059 (3.9)               | 930 (3.4)                    | 0.025           |
| Others                              | 1,392 (5.2)               | 1,150 (4.3)                  | 0.042           |
| NSAIDs                              | 13,335 (49.3)             | 11,969 (44.3)                | 0.101           |
| Systematic corticosteroids          | 7,804 (28.9)              | 6,617 (24.5)                 | 0.099           |
| Antipsychotic                       | 3,541 (13.1)              | 2,897 (10.7)                 | 0.074           |
| Antidepressant                      | 3,254 (12.0)              | 2,985 (11.0)                 | 0.031           |
| Vaccine <sup>d</sup>                | 1,497 (5.5)               | 1,295 (4.8)                  | 0.034           |

Abbreviations: SD, standardized difference; CVD, cardiovascular disease; ER, emergency room; COPD, chronic obstructive pulmonary disease; NSAIDs, Nonsteroidal anti-inflammatory drugs.

<sup>a</sup> SD with a more than 0.1 difference represents meaningful difference between groups

<sup>b</sup> Severe COPD exacerbation was defined as patients requiring hospital or ER visits for COPD.

<sup>c</sup> Moderate COPD exacerbation included patients who were prescribed with either an antibiotics or oral corticosteroid in an outpatient COPD visit.

<sup>d</sup> Only the vaccines of influenza and pneumonia were included.

**eTable 6. Numbers needed to harm for CVD risk from using LABAs and LAMAs in our primary and secondary analyses**

| <b>Bronchodilator</b>          | <b>Number needed to harm<sup>a</sup><br/>(95% CI)</b> |
|--------------------------------|-------------------------------------------------------|
| <b>LABA new use</b>            | 406 (303-580)                                         |
| Regimen                        |                                                       |
| +ICS                           | 398 (299-564)                                         |
| +SABA                          | 483 (299-966)                                         |
| +Ipratropium                   | 483 (290-1,067)                                       |
| +Methylxanthines               | 406 (268-725)                                         |
| Individual drugs               |                                                       |
| Salmeterol                     | 415 (295-655)                                         |
| Formoterol                     | 391 (239-811)                                         |
| <b>LAMA new use</b>            | 391 (254-725)                                         |
| Regimen                        |                                                       |
| LAMA only                      | 350 (184-1067)                                        |
| +SABA                          | 521 (234-5,066)                                       |
| +Ipratropium                   | 432 (189-5,066)                                       |
| +Methylxanthines               | 432 (237-1,267)                                       |
| Route                          |                                                       |
| DPI only                       | 383 (245-725)                                         |
| <b>LABA &amp; LAMA new use</b> | 198 (107-483)                                         |

Abbreviations: CI = confidence interval; DPI = dry powder inhaler; ICS = inhaled corticosteroid;

SABA = short-acting  $\beta_2$  bronchodilator.

<sup>a</sup>The number needed to harm was calculated based on the formula:  $1/[(OR-1)*UER] + OR/[(OR-1)*(1-UER)]$ , where OR and UER represent the adjusted odds ratio and unexposed event rate, respectively. We estimated an unexposed cardiovascular event as 4.96 per 1,000 persons within 30 days of therapy.

**Excluded in the year preceding cohort entry**

- ① LABAs or LAMAs use
- ② Discontinued health insurance

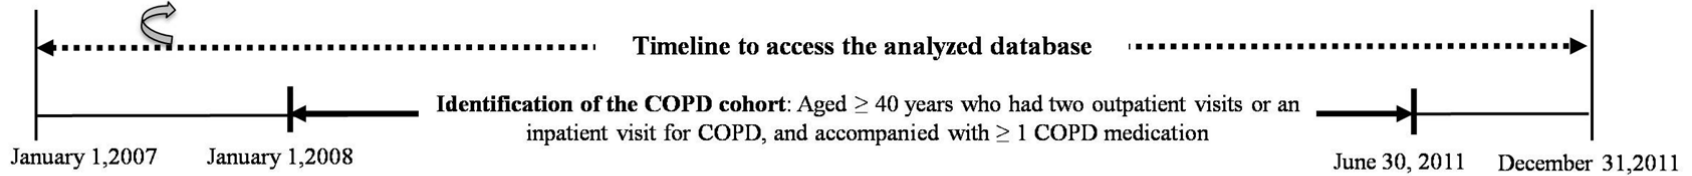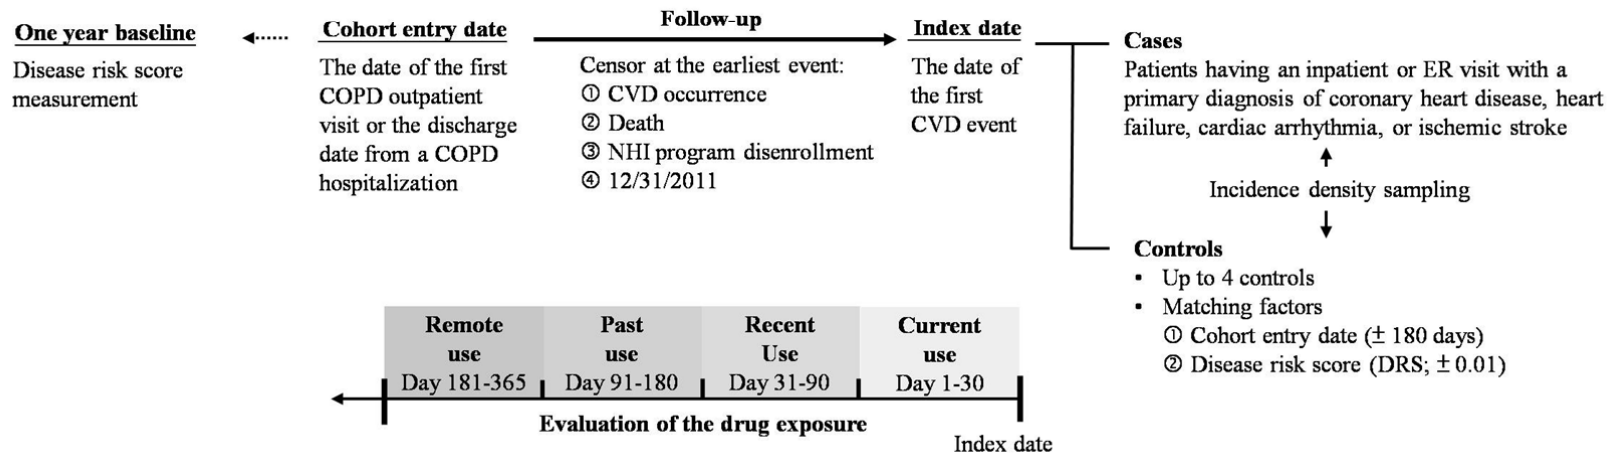

**Figure 1. Overview for the adopted nested case-control study design. CVD, cardiovascular disease; COPD, chronic obstructive pulmonary disease; ER, emergency room; NHI represents National Health Insurance.**

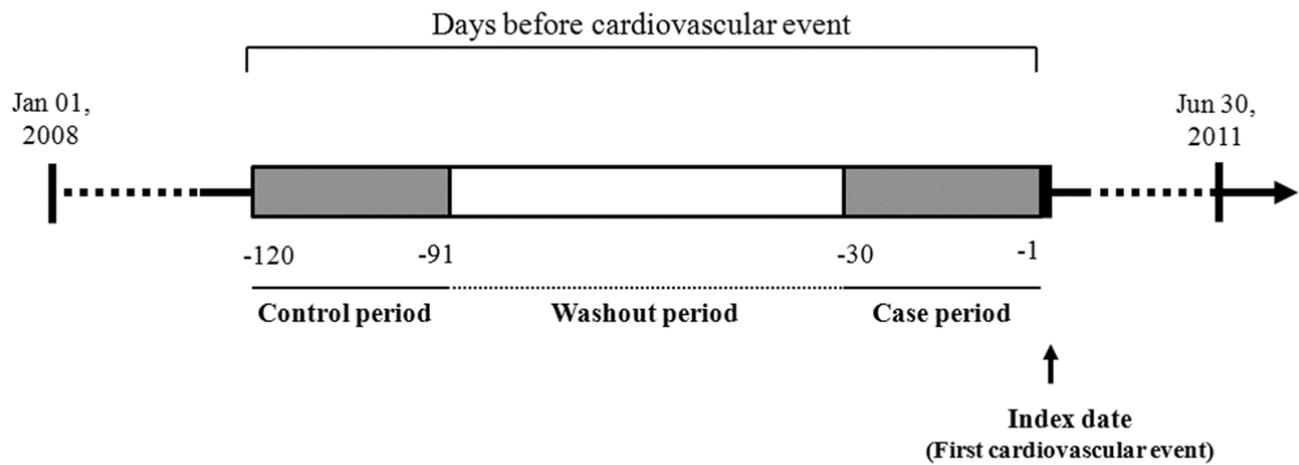

**eFigure 2. Specification of case and control periods in an alternative case-crossover study.**

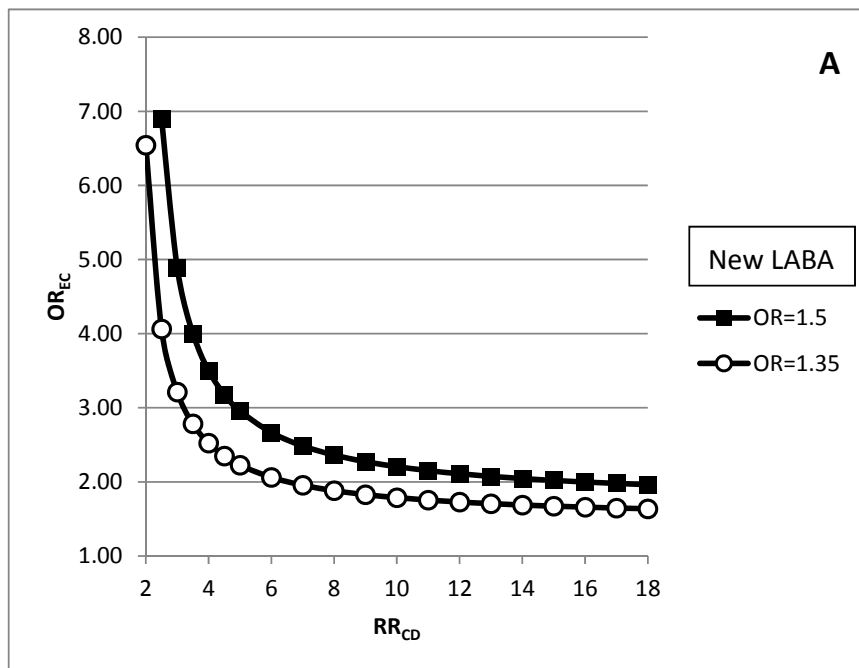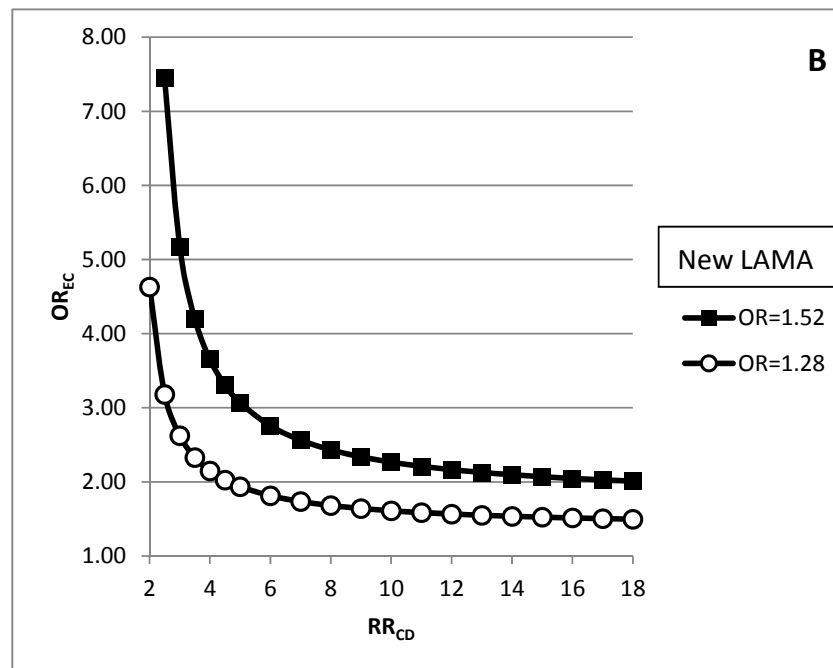

**Figure 3. The impact of unmeasured confounders assessed by the rule-out method.** In the model, we assumed that the prevalence of an unmeasured confounder was 20% and new users of LABA and LAMA were 1% and 0.05%, respectively. The results of assessment are presented in panel A for new LABA use and panel B for new LAMA use. In both panels, all combinations of RR<sub>CD</sub> and OR<sub>EC</sub> that lie in the upper right area of each lines represents that the confounding effect could reverse our positive association between CVD risk and long-acting bronchodilators towards the null. RR<sub>CD</sub> = relative risk of CVDs from unmeasured confounders; OR<sub>EC</sub> = odds ratio between long-acting bronchodilators and unmeasured confounders.

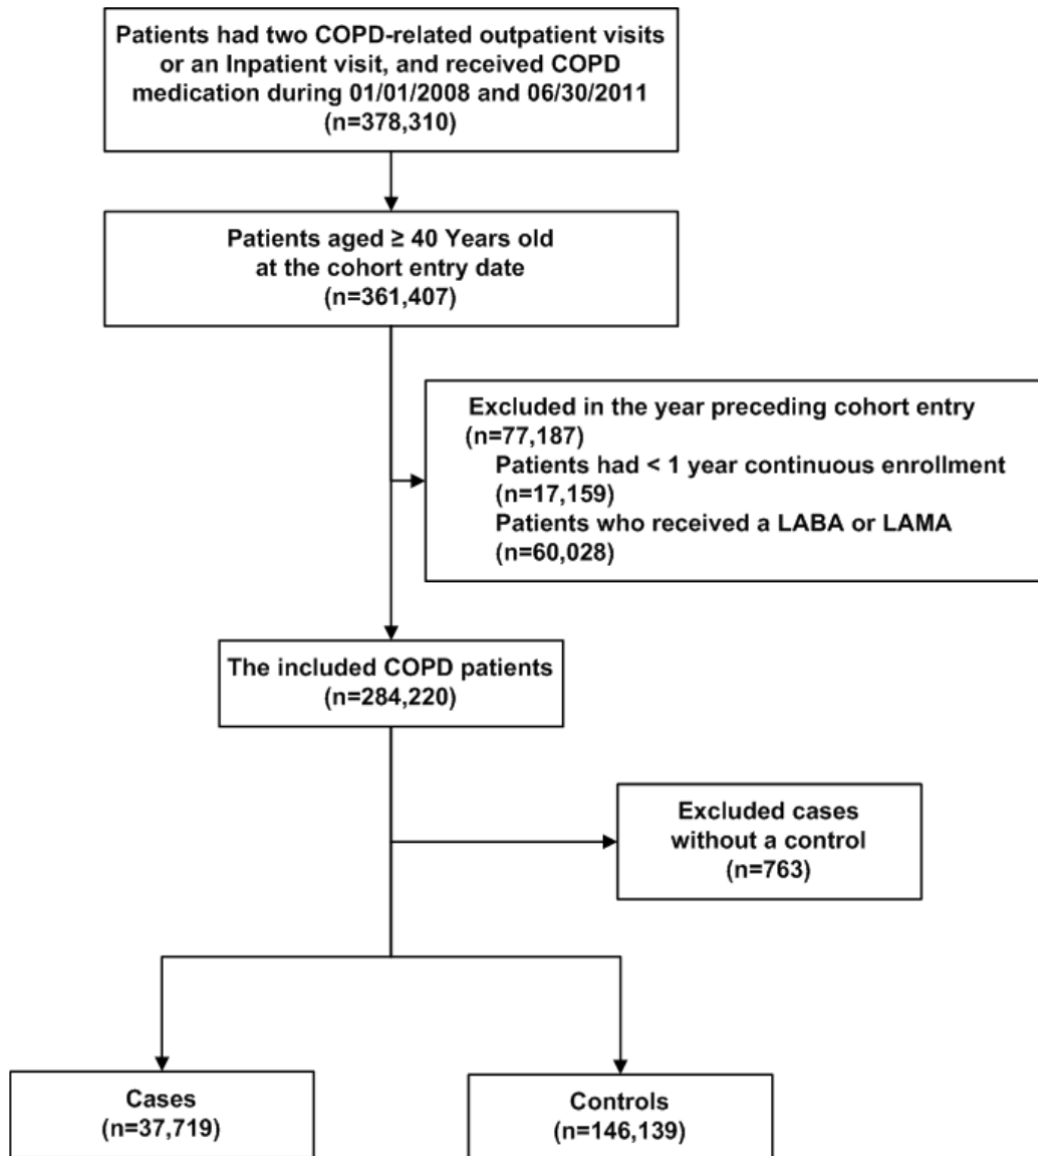

**eFigure 4. Study flow diagram outlining the selection of study cohort.**
